# Supplementary material for: mRNA vaccine effectiveness against SARS-CoV-2 B.1.617.2 (Delta) and B.1.1.529 (Omicron) variant transmission from home care cases to household contacts in South Korea
Source: PubMed Central journal article supplement — Osong Public Health Res Perspect. 2022 Nov 28;13(6):435–42. doi: 10.24171/j.phrp.2022.0243 (PMC10211438; doi:10.24171/j.phrp.2022.0243), 2022-11-28
Supplement: j-phrp-2022-0243-suppl1.pdf [file j-phrp-2022-0243-suppl1.pdf]

**Table S1.** Secondary attack rates and adjusted relative risks by sex, age and vaccination status of index cases in the South Korea

| Characteristic     | Total        |                        |                    |                   |                            |
|--------------------|--------------|------------------------|--------------------|-------------------|----------------------------|
|                    | Index cases  | Household transmission |                    |                   |                            |
|                    | Total (%)    | Total (%)              | Confirmed, SAR (%) | Crude RR (95% CI) | aRR (95% CI) <sup>a)</sup> |
| Total              | 4,450 (100)  | 10,382 (100)           | 2,877 (27.7)       | -                 | -                          |
| Sex                |              |                        |                    |                   |                            |
| Male               | 2,142 (48.1) | 5,157 (49.7)           | 1,425 (27.6)       | Reference         | Reference                  |
| Female             | 2,308 (51.9) | 5,225 (50.3)           | 1,452 (27.8)       | 1.01 (0.93–1.10)  | 0.99 (0.90–1.08)           |
| Age (y)            |              |                        |                    |                   |                            |
| ≤ 19               | 1,812 (40.7) | 4,800 (46.2)           | 1,286 (26.8)       | 0.78 (0.70–0.86)  | 0.62 (0.54–0.70)           |
| 20–29              | 577 (13.0)   | 1,171 (11.3)           | 266 (22.7)         | 0.63 (0.53–0.73)  | 0.77 (0.65–0.92)           |
| 30–49              | 1,287 (28.9) | 2,903 (28.0)           | 928 (32.0)         | Reference         | Reference                  |
| 50–74              | 704 (15.8)   | 1,393 (13.4)           | 353 (25.3)         | 0.72 (0.63–0.83)  | 0.92 (0.79–1.08)           |
| ≥ 75               | 70 (1.6)     | 115 (1.1)              | 44 (38.3)          | 1.32 (0.90–1.94)  | 1.87 (1.23–2.84)           |
| Vaccination status |              |                        |                    |                   |                            |
| Unvaccinated       | 2,412 (54.2) | 5,948 (57.3)           | 1,833 (30.8)       | Reference         | Reference                  |
| 1 Dose             |              |                        |                    |                   |                            |
| 1 mRNA             | 211 (4.7)    | 477 (4.6)              | 119 (24.9)         | 0.75 (0.60–0.93)  | 0.68 (0.54–0.87)           |
| 2 Dose             |              |                        |                    |                   |                            |
| mRNA (≤ 90 d)      | 917 (20.6)   | 2,030 (19.6)           | 450 (22.2)         | 0.64 (0.57–0.72)  | 0.56 (0.48–0.65)           |
| mRNA (> 90 d)      | 823 (18.5)   | 1,758 (16.9)           | 452 (25.7)         | 0.78 (0.69–0.88)  | 0.68 (0.58–0.79)           |
| 3 Dose             |              |                        |                    |                   |                            |
| 3 mRNA             | 87 (2.0)     | 169 (1.6)              | 23 (13.6)          | 0.35 (0.23–0.55)  | 0.28 (0.18–0.46)           |

SAR, secondary attack rate; RR, relative risk; aRR, adjusted RR; CI, confidence interval.

<sup>a)</sup>Adjusted by variant, sex, age, vaccine status, date of diagnosis date of index cases and household contacts.
