# Supplementary material for: mRNA vaccine effectiveness against SARS-CoV-2 B.1.617.2 (Delta) and B.1.1.529 (Omicron) variant transmission from home care cases to household contacts in South Korea
Source: PubMed Central journal article supplement — Osong Public Health Res Perspect. 2022 Nov 28;13(6):435–42. doi: 10.24171/j.phrp.2022.0243 (PMC10211438; doi:10.24171/j.phrp.2022.0243), 2022-11-28
Supplement: j-phrp-2022-0243-suppl2.pdf [file j-phrp-2022-0243-suppl2.pdf]

**Table S2.** Secondary attack rates and adjusted relative risks by sex, age and vaccination status of index cases with Delta variant in the South Korea

| Characteristic     | Delta        |                        |              |                    |                   |
|--------------------|--------------|------------------------|--------------|--------------------|-------------------|
|                    | Index cases  | Household transmission |              |                    |                   |
|                    |              | Total (%)              | Total (%)    | Confirmed, SAR (%) | Crude RR (95% CI) |
| Total              | 3,690 (100)  | 8,719 (100)            | 2,382 (27.3) | -                  | -                 |
| Sex                |              |                        |              |                    |                   |
| Male               | 1,815 (49.2) | 4,428 (50.8)           | 1,211 (27.3) | Reference          | Reference         |
| Female             | 1,875 (50.8) | 4,291 (49.2)           | 1,171 (27.3) | 0.99 (0.91–1.10)   | 0.97 (0.88–1.07)  |
| Age (y)            |              |                        |              |                    |                   |
| ≤ 19               | 1,568 (42.5) | 4,204 (48.2)           | 1,108 (26.4) | 0.80 (0.72–0.90)   | 0.67 (0.58–0.78)  |
| 20–29              | 409 (11.1)   | 836 (9.6)              | 203 (24.3)   | 0.72 (0.60–0.86)   | 0.90 (0.74–1.10)  |
| 30–49              | 1,038 (28.1) | 2,377 (27.3)           | 732 (30.8)   | Reference          | Reference         |
| 50–74              | 609 (16.5)   | 1,192 (13.7)           | 297 (24.9)   | 0.75 (0.64–0.87)   | 0.98 (0.82–1.17)  |
| ≥ 75               | 66 (1.8)     | 110 (1.3)              | 42 (38.2)    | 1.39 (0.94–2.06)   | 2.04 (1.32–3.17)  |
| Vaccination status |              |                        |              |                    |                   |
| Unvaccinated       | 2,190 (59.3) | 5,422 (62.2)           | 1,640 (30.2) | Reference          | Reference         |
| 1 Dose             |              |                        |              |                    |                   |
| 1 mRNA             | 195 (5.3)    | 439 (5.0)              | 106 (24.1)   | 0.73 (0.59–0.92)   | 0.70 (0.54–0.89)  |
| 2 Dose             |              |                        |              |                    |                   |
| mRNA (≤ 90 d)      | 737 (20.0)   | 1,662 (19.1)           | 374 (22.5)   | 0.65 (0.59–0.76)   | 0.63 (0.53–0.74)  |
| mRNA (> 90 d)      | 540 (14.6)   | 1,138 (13.1)           | 253 (22.2)   | 0.66 (0.57–0.77)   | 0.63 (0.52–0.77)  |
| 3 Dose             |              |                        |              |                    |                   |
| 3 mRNA             | 28 (0.8)     | 58 (0.7)               | 9 (15.5)     | 0.42 (0.21–0.86)   | 0.41 (0.19–0.87)  |

SAR, secondary attack rate; RR, relative risk; aRR, adjusted RR; CI, confidence interval.

<sup>a)</sup>Adjusted by variant, sex, age, vaccine status, date of diagnosis date of index cases and household contacts.
