# Supplementary material for: mRNA vaccine effectiveness against SARS-CoV-2 B.1.617.2 (Delta) and B.1.1.529 (Omicron) variant transmission from home care cases to household contacts in South Korea
Source: PubMed Central journal article supplement — Osong Public Health Res Perspect. 2022 Nov 28;13(6):435–42. doi: 10.24171/j.phrp.2022.0243 (PMC10211438; doi:10.24171/j.phrp.2022.0243), 2022-11-28
Supplement: j-phrp-2022-0243-suppl3.pdf [file j-phrp-2022-0243-suppl3.pdf]

**Table S3.** Secondary attack rates and adjusted relative risks by sex, age and vaccination status of index cases with Omicron variant in the South Korea

| Characteristic     | Omicron     |                        |            |                    |                   |
|--------------------|-------------|------------------------|------------|--------------------|-------------------|
|                    | Index cases | Household transmission |            |                    |                   |
|                    |             | Total (%)              | Total (%)  | Confirmed, SAR (%) | Crude RR (95% CI) |
| Total              | 760 (100)   | 1,663 (100)            | 495 (29.8) | -                  | -                 |
| Sex                |             |                        |            |                    |                   |
| Male               | 327 (43.0)  | 729 (43.8)             | 214 (29.4) | Reference          | Reference         |
| Female             | 433 (57.0)  | 934 (56.2)             | 281 (30.1) | 1.04 (0.84–1.28)   | 1.06 (0.84–1.33)  |
| Age (y)            |             |                        |            |                    |                   |
| ≤ 19               | 244 (32.1)  | 596 (35.8)             | 178 (29.9) | 0.72 (0.56–0.92)   | 0.49 (0.35–0.67)  |
| 20–29              | 168 (22.1)  | 335 (20.1)             | 63 (18.8)  | 0.39 (0.28–0.54)   | 0.44 (0.31–0.64)  |
| 30–49              | 249 (32.8)  | 526 (31.6)             | 196 (37.3) | Reference          | Reference         |
| 50–74              | 95 (12.5)   | 201 (12.1)             | 56 (27.9)  | 0.65 (0.46–0.93)   | 0.68 (0.46–1.01)  |
| ≥ 75               | 4 (0.5)     | 5 (0.3)                | 2 (40.0)   | 1.12 (0.19–6.78)   | 3.07 (0.41–22.96) |
| Vaccination status |             |                        |            |                    |                   |
| Unvaccinated       | 222 (29.2)  | 526 (31.6)             | 193 (36.7) | Reference          | Reference         |
| 1 Dose             |             |                        |            |                    |                   |
| 1 mRNA             | 16 (2.1)    | 38 (2.3)               | 13 (34.2)  | 0.90 (0.45–1.80)   | 0.73 (0.36–1.50)  |
| 2 Dose             |             |                        |            |                    |                   |
| mRNA (≤ 90 d)      | 180 (23.7)  | 368 (22.1)             | 76 (20.7)  | 0.45 (0.33–0.61)   | 0.36 (0.25–0.51)  |
| mRNA (> 90 d)      | 283 (37.2)  | 620 (37.3)             | 199 (32.1) | 0.82 (0.64–1.04)   | 0.73 (0.53–1.01)  |
| 3 Dose             |             |                        |            |                    |                   |
| 3 mRNA             | 59 (7.8)    | 111 (6.7)              | 14 (12.6)  | 0.25 (0.14–0.45)   | 0.22 (0.11–0.42)  |

SAR, secondary attack rate; RR, relative risk; aRR, adjusted RR; CI, confidence interval.

<sup>a)</sup>Adjusted by variant, sex, age, vaccine status, date of diagnosis date of index cases and household contacts.
